# Supplementary material for: Substrate binding in the allosteric site mimics homotropic cooperativity in the SIS‐fold glucosamine‐6‐phosphate deaminases
Source: PubMed Central journal article supplement — Protein Sci. 2023 Jun 1;32(6):e4651. doi: 10.1002/pro.4651 (PMC10201695; doi:10.1002/pro.4651), 2023-06-01
Supplement: PRO-32-e4651-s001.pdf [file PRO-32-e4651-s001.pdf]

## Supporting Information

### **Substrate Binding in the Allosteric Site Mimics Homotropic Cooperativity in the SIS-fold Glucosamine-6-phosphate Deaminases**

Jorge Marcos-Viquez<sup>a</sup>, Annia Rodríguez-Hernández<sup>b</sup>, Laura I. Álvarez-Añorve<sup>a</sup>, Andrea Celeste Medina-García<sup>a</sup>, Jacqueline Plumbridge<sup>c</sup>, Mario L. Calcagno<sup>a</sup>, Adela Rodríguez-Romero<sup>b</sup> and Ismael Bustos-Jaimes<sup>a,\*</sup>

<sup>a</sup> Departamento de Bioquímica, Facultad de Medicina, Universidad Nacional Autónoma de México (UNAM), Mexico City 04510, Mexico

<sup>b</sup> Instituto de Química, UNAM, Mexico City 04510, Mexico

<sup>c</sup> UMR8261 (CNRS, Université Paris Cité), Institut de Biologie Physico-Chimique, 75005 Paris, France

\* Corresponding author email: [ismaelb@unam.mx](mailto:ismaelb@unam.mx)

## Figures

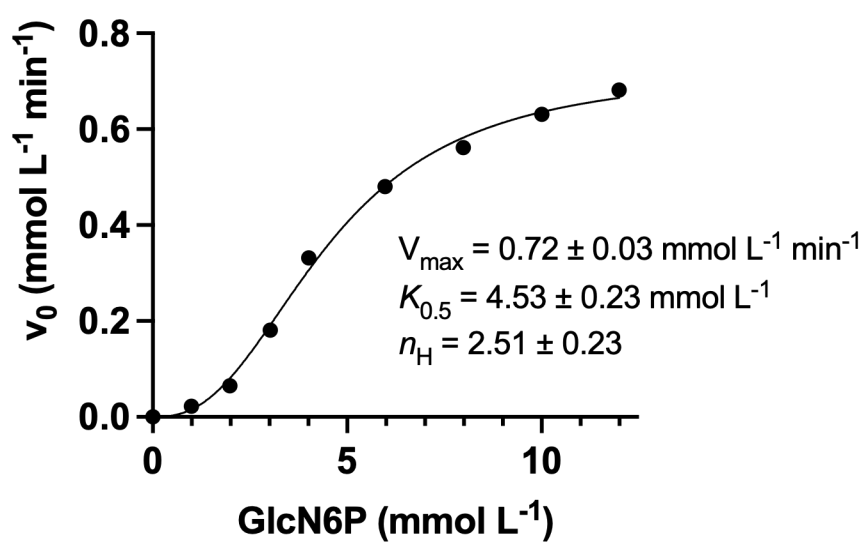

Fig. S1. Kinetics of SoNagBII in absence of GlcNAc6P at 30 °C and pH 7.5. Data was fitted to Hill equation (Eq. 1). These data confirm the data previously reported by Yang et al. 2006 for the same enzyme. Uncertainties are the standard errors of the fitted parameters.

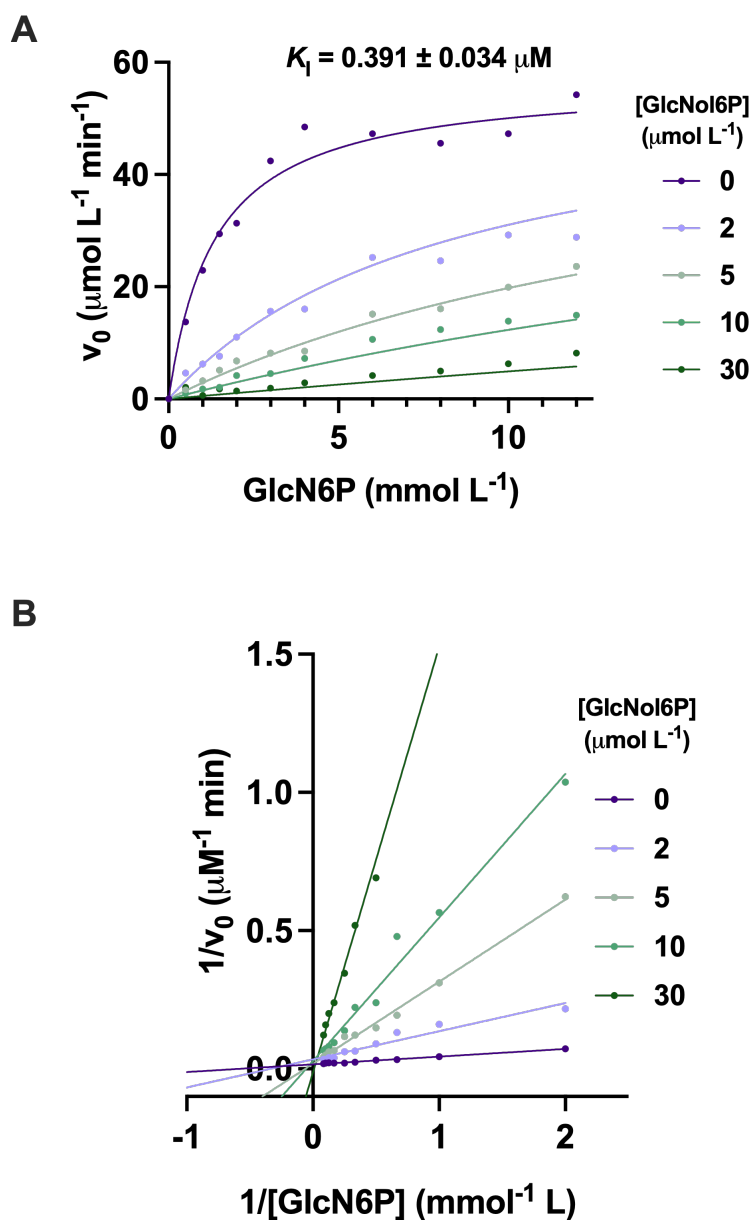

Fig. S2. Global fitting of the GlcNAc6P-saturated SdNagBII kinetic data (Fig 1 B) to the classic competitive inhibition equation with GraphPad Prism 5.0. A) Non-linear regression fitting;  $V_{\max} = 56.86 \pm 1.52 \mu\text{M min}^{-1}$ ,  $K_m = 1.36 \pm 0.14 \text{ mM}$ , and  $K_i = 0.391 \pm 0.034 \mu\text{M}$ . Uncertainties are the standard errors of the fitted parameters. B) Double reciprocal plot of data in panel A.

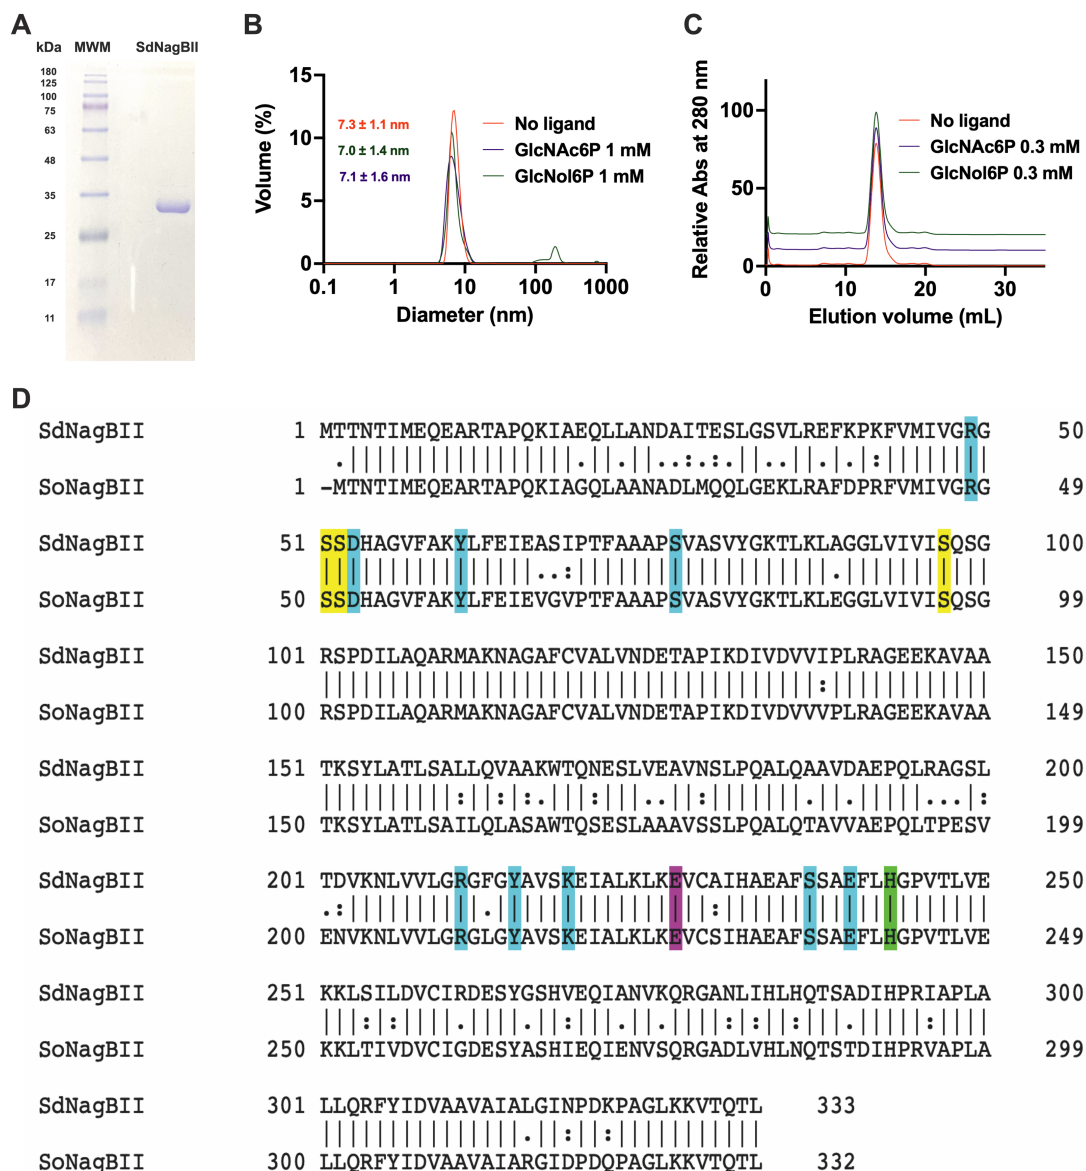

Fig. S3. A) SDS-PAGE analysis of the purified SdNagBII. B) DLS analysis of the hydrodynamic diameter of SdNagBII 0.2 mg/mL without ligands (orange), with 1 mM GlcNol6P (green), and with 1 mM GlcNAc6P (purple). The analysis was carried out in Tris-HCl 100 mM, pH 8.4, 300 mM NaCl, 1 mM DTT at 30 °C. The diameter of the protein species is congruent with the diameter of the dimer measured in the crystallographic structures. C) SEC analysis of the hydrodynamic diameter of SdNagBII without ligands (orange), with 0.3 mM GlcNol6P (green), and with 0.3 mM GlcNAc6P (purple). D) Alignment of the protein sequences of the NagBII from *S. denitrificans* (GenBank ABE55984) and *S. oendensis* (GenBank AAN56497). Residues involved in active and allosteric site binding are shown in yellow and cyan respectively; H243, catalytic His, and E227, residue responsible for enolization of substrate, are shown in green and magenta respectively. Mutating His242Gln in SoNagBII reduced  $k_{cat}$  from  $6.02 \pm 0.25 \text{ s}^{-1}$  to  $0.005 \pm 0.001 \text{ s}^{-1}$ .

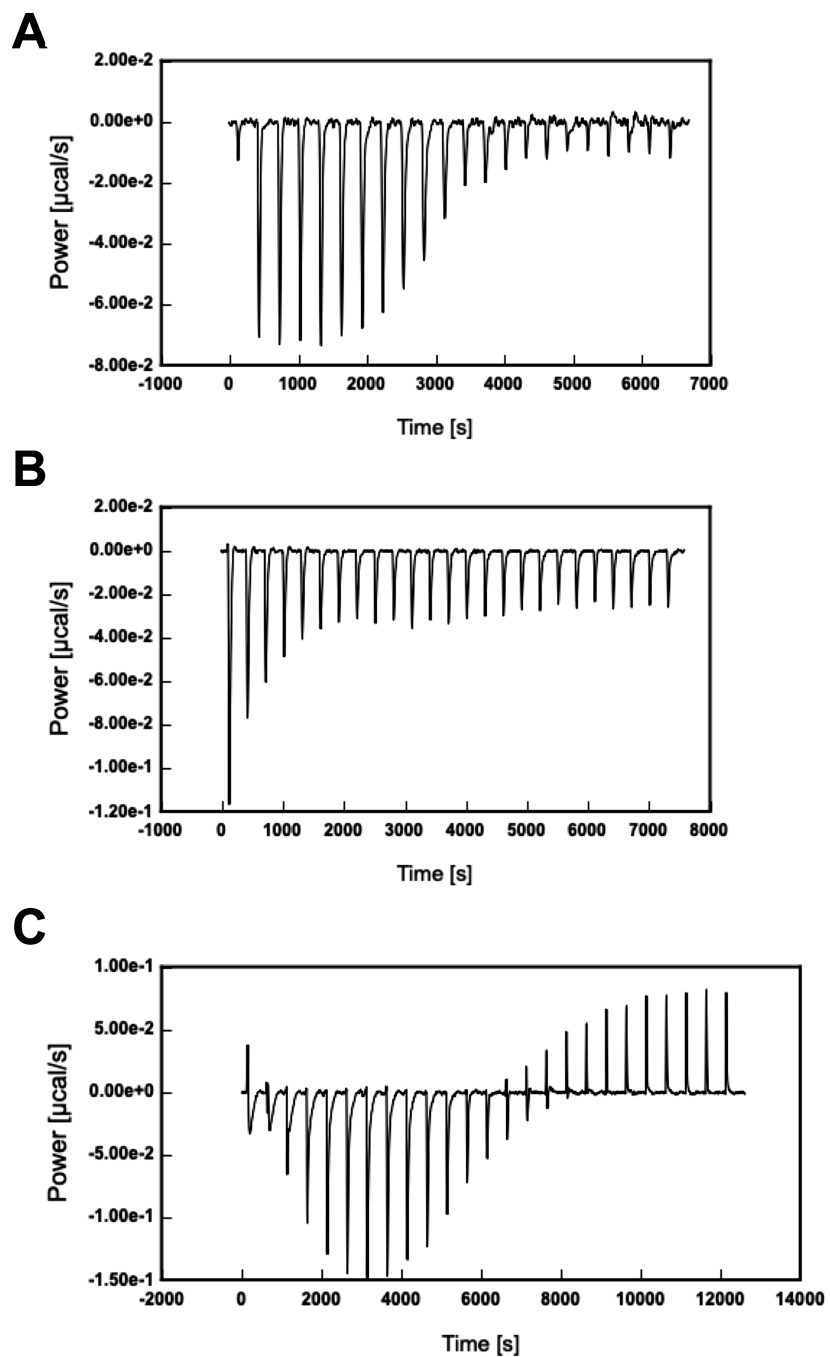

Fig. S4. Representative baseline-corrected ITC thermograms of samples shown in Figure 1 D-F. A) titration of SdNagBII with GlcNAc6P; B) titration of the GlcNAc6P-saturated SdNagBII with GlcNol6P; C) titration of SdNagBII with GlcNol6P.

## Tables

Table S1. List of protein-GlcNol6P interactions at the novel allosteric site (1).

PDB code: 8FDB chain A

### Hydrogen bonds

| <----- A T O M 1 -----> |           |          |        |       |   | <----- A T O M 2 -----> |           |          |        |       |          |       |
|-------------------------|-----------|----------|--------|-------|---|-------------------------|-----------|----------|--------|-------|----------|-------|
| Atom no                 | Atom name | Res name | Res no | Chain |   | Atom no                 | Atom name | Res name | Res no | Chain | Distance |       |
| 1                       | 62        | OG       | SER    | 237   | B | ---                     | 12        | O3P      | AGP    | 601   | A        | 2.836 |
| 2                       | 56        | NH2      | ARG    | 211   | B | ---                     | 10        | O2P      | AGP    | 601   | A        | 3.168 |
| 3                       | 34        | OH       | TYR    | 61    | B | ---                     | 9         | O1P      | AGP    | 601   | A        | 2.933 |
| 4                       | 22        | OG       | SER    | 77    | A | ---                     | 9         | O1P      | AGP    | 601   | A        | 2.582 |
| 5                       | 17        | N        | SER    | 77    | A | ---                     | 10        | O2P      | AGP    | 601   | A        | 3.041 |
| 6                       | 45        | NH2      | ARG    | 49    | A | ---                     | 10        | O2P      | AGP    | 601   | A        | 2.709 |

### Non-bonded contacts

| <----- A T O M 1 -----> |           |          |        |       |   | <----- A T O M 2 -----> |           |          |        |       |          |       |
|-------------------------|-----------|----------|--------|-------|---|-------------------------|-----------|----------|--------|-------|----------|-------|
| Atom no                 | Atom name | Res name | Res no | Chain |   | Atom no                 | Atom name | Res name | Res no | Chain | Distance |       |
| 1                       | 85        | CZ       | TYR    | 215   | B | ---                     | 13        | O4       | AGP    | 601   | A        | 3.284 |
| 2                       | 84        | CE2      | TYR    | 215   | B | ---                     | 13        | O4       | AGP    | 601   | A        | 3.499 |
| 3                       | 61        | CB       | SER    | 237   | B | ---                     | 12        | O3P      | AGP    | 601   | A        | 3.479 |
| 4                       | 52        | CD       | ARG    | 211   | B | ---                     | 12        | O3P      | AGP    | 601   | A        | 3.879 |
| 5                       | 101       | CD       | GLU    | 240   | B | ---                     | 11        | O3       | AGP    | 601   | A        | 3.859 |
| 6                       | 100       | CG       | GLU    | 240   | B | ---                     | 11        | O3       | AGP    | 601   | A        | 3.797 |
| 7                       | 54        | CZ       | ARG    | 211   | B | ---                     | 10        | O2P      | AGP    | 601   | A        | 3.730 |
| 8                       | 33        | CZ       | TYR    | 61    | B | ---                     | 9         | O1P      | AGP    | 601   | A        | 3.798 |
| 9                       | 31        | CE1      | TYR    | 61    | B | ---                     | 9         | O1P      | AGP    | 601   | A        | 3.745 |
| 10                      | 34        | OH       | TYR    | 61    | B | ---                     | 6         | C6       | AGP    | 601   | A        | 3.704 |
| 11                      | 86        | OH       | TYR    | 215   | B | ---                     | 1         | C1       | AGP    | 601   | A        | 3.397 |
| 12                      | 16        | P        | AGP    | 601   | A | ---                     | 21        | CB       | SER    | 77    | A        | 3.589 |
| 13                      | 10        | O2P      | AGP    | 601   | A | ---                     | 21        | CB       | SER    | 77    | A        | 3.186 |
| 14                      | 9         | O1P      | AGP    | 601   | A | ---                     | 21        | CB       | SER    | 77    | A        | 3.276 |
| 15                      | 10        | O2P      | AGP    | 601   | A | ---                     | 18        | CA       | SER    | 77    | A        | 3.597 |
| 16                      | 9         | O1P      | AGP    | 601   | A | ---                     | 18        | CA       | SER    | 77    | A        | 3.878 |
| 17                      | 15        | O6       | AGP    | 601   | A | ---                     | 69        | CD       | PRO    | 76    | A        | 3.470 |
| 18                      | 14        | O5       | AGP    | 601   | A | ---                     | 69        | CD       | PRO    | 76    | A        | 3.344 |
| 19                      | 9         | O1P      | AGP    | 601   | A | ---                     | 69        | CD       | PRO    | 76    | A        | 3.786 |
| 20                      | 10        | O2P      | AGP    | 601   | A | ---                     | 67        | CB       | PRO    | 76    | A        | 3.748 |
| 21                      | 9         | O1P      | AGP    | 601   | A | ---                     | 74        | CB       | ALA    | 75    | A        | 3.456 |
| 22                      | 9         | O1P      | AGP    | 601   | A | ---                     | 72        | C        | ALA    | 75    | A        | 3.614 |
| 23                      | 9         | O1P      | AGP    | 601   | A | ---                     | 71        | CA       | ALA    | 75    | A        | 3.658 |
| 24                      | 3         | C3       | AGP    | 601   | A | ---                     | 94        | OD2      | ASP    | 53    | A        | 3.608 |
| 25                      | 2         | C2       | AGP    | 601   | A | ---                     | 93        | OD1      | ASP    | 53    | A        | 3.621 |
| 26                      | 5         | C5       | AGP    | 601   | A | ---                     | 44        | NH1      | ARG    | 49    | A        | 3.859 |
| 27                      | 15        | O6       | AGP    | 601   | A | ---                     | 43        | CZ       | ARG    | 49    | A        | 3.860 |
| 28                      | 10        | O2P      | AGP    | 601   | A | ---                     | 43        | CZ       | ARG    | 49    | A        | 3.886 |

Table S1. Continuation.

PDB code: 8FDB chain B

Hydrogen bonds

| <----- A T O M 1 -----> |           |          |        |       |   |         | <----- A T O M 2 -----> |          |        |       |          |       |  |
|-------------------------|-----------|----------|--------|-------|---|---------|-------------------------|----------|--------|-------|----------|-------|--|
| Atom no                 | Atom name | Res name | Res no | Chain |   | Atom no | Atom name               | Res name | Res no | Chain | Distance |       |  |
| 1                       | 86        | N        | GLY    | 212   | A | ---     | 46                      | MG       | MG     | 2     | C        | 3.191 |  |
| 2                       | 46        | MG       | MG     | 2     | C | ---     | 28                      | OH       | TYR    | 61    | A        | 2.898 |  |
| 3                       | 46        | MG       | MG     | 2     | C | ---     | 12                      | O3P      | AGP    | 401   | B        | 2.544 |  |
| 4                       | 85        | NZ       | LYS    | 219   | B | ---     | 8                       | O1       | AGP    | 401   | B        | 3.030 |  |
| 5                       | 34        | OG       | SER    | 77    | B | ---     | 9                       | O1P      | AGP    | 401   | B        | 2.537 |  |
| 6                       | 29        | N        | SER    | 77    | B | ---     | 10                      | O2P      | AGP    | 401   | B        | 2.921 |  |
| 7                       | 69        | NH2      | ARG    | 49    | B | ---     | 10                      | O2P      | AGP    | 401   | B        | 2.780 |  |
| 8                       | 58        | OH       | TYR    | 215   | A | ---     | 13                      | O4       | AGP    | 401   | B        | 2.929 |  |
| 9                       | 45        | NH2      | ARG    | 211   | A | ---     | 10                      | O2P      | AGP    | 401   | B        | 3.057 |  |
| 10                      | 44        | NH1      | ARG    | 211   | A | ---     | 10                      | O2P      | AGP    | 401   | B        | 2.822 |  |
| 11                      | 28        | OH       | TYR    | 61    | A | ---     | 9                       | O1P      | AGP    | 401   | B        | 2.708 |  |

Non-bonded contacts

| <----- A T O M 1 -----> |           |          |        |       |   |         | <----- A T O M 2 -----> |          |        |       |          |       |  |
|-------------------------|-----------|----------|--------|-------|---|---------|-------------------------|----------|--------|-------|----------|-------|--|
| Atom no                 | Atom name | Res name | Res no | Chain |   | Atom no | Atom name               | Res name | Res no | Chain | Distance |       |  |
| 1                       | 16        | P        | AGP    | 401   | B | ---     | 33                      | CB       | SER    | 77    | B        | 3.758 |  |
| 2                       | 10        | O2P      | AGP    | 401   | B | ---     | 33                      | CB       | SER    | 77    | B        | 3.389 |  |
| 3                       | 9         | O1P      | AGP    | 401   | B | ---     | 33                      | CB       | SER    | 77    | B        | 3.320 |  |
| 4                       | 10        | O2P      | AGP    | 401   | B | ---     | 30                      | CA       | SER    | 77    | B        | 3.632 |  |
| 5                       | 15        | O6       | AGP    | 401   | B | ---     | 76                      | CD       | PRO    | 76    | B        | 3.361 |  |
| 6                       | 14        | O5       | AGP    | 401   | B | ---     | 76                      | CD       | PRO    | 76    | B        | 3.458 |  |
| 7                       | 10        | O2P      | AGP    | 401   | B | ---     | 76                      | CD       | PRO    | 76    | B        | 3.651 |  |
| 8                       | 10        | O2P      | AGP    | 401   | B | ---     | 74                      | CB       | PRO    | 76    | B        | 3.532 |  |
| 9                       | 10        | O2P      | AGP    | 401   | B | ---     | 72                      | C        | PRO    | 76    | B        | 3.802 |  |
| 10                      | 10        | O2P      | AGP    | 401   | B | ---     | 71                      | CA       | PRO    | 76    | B        | 3.894 |  |
| 11                      | 9         | O1P      | AGP    | 401   | B | ---     | 94                      | CB       | ALA    | 75    | B        | 3.342 |  |
| 12                      | 9         | O1P      | AGP    | 401   | B | ---     | 92                      | C        | ALA    | 75    | B        | 3.719 |  |
| 13                      | 9         | O1P      | AGP    | 401   | B | ---     | 91                      | CA       | ALA    | 75    | B        | 3.760 |  |
| 14                      | 2         | C2       | AGP    | 401   | B | ---     | 111                     | OD2      | ASP    | 53    | B        | 3.606 |  |
| 15                      | 2         | C2       | AGP    | 401   | B | ---     | 110                     | OD1      | ASP    | 53    | B        | 3.843 |  |
| 16                      | 10        | O2P      | AGP    | 401   | B | ---     | 67                      | CZ       | ARG    | 49    | B        | 3.853 |  |
| 17                      | 11        | O3       | AGP    | 401   | B | ---     | 101                     | CD       | GLU    | 240   | A        | 3.853 |  |
| 18                      | 11        | O3       | AGP    | 401   | B | ---     | 100                     | CG       | GLU    | 240   | A        | 3.742 |  |
| 19                      | 12        | O3P      | AGP    | 401   | B | ---     | 116                     | CB       | SER    | 237   | A        | 3.144 |  |
| 20                      | 1         | C1       | AGP    | 401   | B | ---     | 58                      | OH       | TYR    | 215   | A        | 3.245 |  |
| 21                      | 13        | O4       | AGP    | 401   | B | ---     | 57                      | CZ       | TYR    | 215   | A        | 3.134 |  |
| 22                      | 13        | O4       | AGP    | 401   | B | ---     | 56                      | CE2      | TYR    | 215   | A        | 3.171 |  |
| 23                      | 12        | O3P      | AGP    | 401   | B | ---     | 43                      | CZ       | ARG    | 211   | A        | 3.664 |  |
| 24                      | 10        | O2P      | AGP    | 401   | B | ---     | 43                      | CZ       | ARG    | 211   | A        | 3.265 |  |
| 25                      | 6         | C6       | AGP    | 401   | B | ---     | 28                      | OH       | TYR    | 61    | A        | 3.595 |  |
| 26                      | 9         | O1P      | AGP    | 401   | B | ---     | 27                      | CZ       | TYR    | 61    | A        | 3.614 |  |
| 27                      | 9         | O1P      | AGP    | 401   | B | ---     | 25                      | CE1      | TYR    | 61    | A        | 3.630 |  |

Table S2. List of protein-GlcNAc6P interactions at the novel allosteric site (1).

PDB code: 8EYM chain A

Hydrogen bonds

| <----- A T O M 1 -----> |           |          |         |       |     |         | <----- A T O M 2 -----> |          |        |       |          |  |  |
|-------------------------|-----------|----------|---------|-------|-----|---------|-------------------------|----------|--------|-------|----------|--|--|
| Atom no                 | Atom name | Res name | Res no  | Chain |     | Atom no | Atom name               | Res name | Res no | Chain | Distance |  |  |
| 1                       | 61        | N        | SER 237 | B     | --- | 82      | O                       | HOH 25   | S      |       | 2.944    |  |  |
| 2                       | 88        | N        | GLY 212 | B     | --- | 31      | O                       | HOH 110  | S      |       | 2.967    |  |  |
| 3                       | 49        | OH       | TYR 61  | B     | --- | 31      | O                       | HOH 110  | S      |       | 2.762    |  |  |
| 4                       | 82        | O        | HOH 25  | S     | --- | 15      | O4                      | 16G 400  | A      |       | 2.615    |  |  |
| 5                       | 31        | O        | HOH 110 | S     | --- | 14      | O3P                     | 16G 400  | A      |       | 2.718    |  |  |
| 6                       | 66        | OG       | SER 237 | B     | --- | 14      | O3P                     | 16G 400  | A      |       | 2.676    |  |  |
| 7                       | 57        | NE       | ARG 211 | B     | --- | 14      | O3P                     | 16G 400  | A      |       | 2.802    |  |  |
| 8                       | 60        | NH2      | ARG 211 | B     | --- | 12      | O2P                     | 16G 400  | A      |       | 3.346    |  |  |
| 9                       | 31        | O        | HOH 110 | S     | --- | 11      | O1P                     | 16G 400  | A      |       | 2.651    |  |  |
| 10                      | 49        | OH       | TYR 61  | B     | --- | 11      | O1P                     | 16G 400  | A      |       | 2.753    |  |  |
| 11                      | 37        | OG       | SER 77  | A     | --- | 11      | O1P                     | 16G 400  | A      |       | 2.698    |  |  |
| 12                      | 32        | N        | SER 77  | A     | --- | 12      | O2P                     | 16G 400  | A      |       | 2.482    |  |  |
| 13                      | 9         | N2       | 16G 400 | A     | --- | 74      | OD2                     | ASP 53   | A      |       | 3.017    |  |  |
| 14                      | 30        | NH2      | ARG 49  | A     | --- | 12      | O2P                     | 16G 400  | A      |       | 2.889    |  |  |
| 15                      | 29        | NH1      | ARG 49  | A     | --- | 17      | O6                      | 16G 400  | A      |       | 3.049    |  |  |

Non-bonded contacts

| <----- A T O M 1 -----> |           |          |         |       |     |         | <----- A T O M 2 -----> |          |        |       |          |  |  |
|-------------------------|-----------|----------|---------|-------|-----|---------|-------------------------|----------|--------|-------|----------|--|--|
| Atom no                 | Atom name | Res name | Res no  | Chain |     | Atom no | Atom name               | Res name | Res no | Chain | Distance |  |  |
| 1                       | 103       | CD       | GLU 240 | B     | --- | 15      | O4                      | 16G 400  | A      |       | 3.580    |  |  |
| 2                       | 102       | CG       | GLU 240 | B     | --- | 15      | O4                      | 16G 400  | A      |       | 3.304    |  |  |
| 3                       | 101       | CB       | GLU 240 | B     | --- | 15      | O4                      | 16G 400  | A      |       | 3.104    |  |  |
| 4                       | 65        | CB       | SER 237 | B     | --- | 15      | O4                      | 16G 400  | A      |       | 3.764    |  |  |
| 5                       | 65        | CB       | SER 237 | B     | --- | 14      | O3P                     | 16G 400  | A      |       | 3.497    |  |  |
| 6                       | 58        | CZ       | ARG 211 | B     | --- | 14      | O3P                     | 16G 400  | A      |       | 3.598    |  |  |
| 7                       | 56        | CD       | ARG 211 | B     | --- | 14      | O3P                     | 16G 400  | A      |       | 3.656    |  |  |
| 8                       | 48        | CZ       | TYR 61  | B     | --- | 11      | O1P                     | 16G 400  | A      |       | 3.636    |  |  |
| 9                       | 46        | CE1      | TYR 61  | B     | --- | 11      | O1P                     | 16G 400  | A      |       | 3.625    |  |  |
| 10                      | 135       | O7       | 16G 400 | B     | --- | 8       | C8                      | 16G 400  | A      |       | 3.895    |  |  |
| 11                      | 65        | CB       | SER 237 | B     | --- | 6       | C6                      | 16G 400  | A      |       | 3.751    |  |  |
| 12                      | 19        | P        | 16G 400 | A     | --- | 36      | CB                      | SER 77   | A      |       | 3.603    |  |  |
| 13                      | 12        | O2P      | 16G 400 | A     | --- | 36      | CB                      | SER 77   | A      |       | 3.328    |  |  |
| 14                      | 11        | O1P      | 16G 400 | A     | --- | 36      | CB                      | SER 77   | A      |       | 3.280    |  |  |
| 15                      | 12        | O2P      | 16G 400 | A     | --- | 33      | CA                      | SER 77   | A      |       | 3.389    |  |  |
| 16                      | 19        | P        | 16G 400 | A     | --- | 81      | CD                      | PRO 76   | A      |       | 3.750    |  |  |
| 17                      | 17        | O6       | 16G 400 | A     | --- | 81      | CD                      | PRO 76   | A      |       | 3.220    |  |  |
| 18                      | 12        | O2P      | 16G 400 | A     | --- | 81      | CD                      | PRO 76   | A      |       | 3.120    |  |  |
| 19                      | 12        | O2P      | 16G 400 | A     | --- | 80      | CG                      | PRO 76   | A      |       | 3.493    |  |  |
| 20                      | 12        | O2P      | 16G 400 | A     | --- | 79      | CB                      | PRO 76   | A      |       | 3.207    |  |  |
| 21                      | 12        | O2P      | 16G 400 | A     | --- | 77      | C                       | PRO 76   | A      |       | 3.228    |  |  |
| 22                      | 12        | O2P      | 16G 400 | A     | --- | 76      | CA                      | PRO 76   | A      |       | 3.330    |  |  |
| 23                      | 11        | O1P      | 16G 400 | A     | --- | 96      | CB                      | ALA 75   | A      |       | 3.775    |  |  |
| 24                      | 12        | O2P      | 16G 400 | A     | --- | 94      | C                       | ALA 75   | A      |       | 3.799    |  |  |
| 25                      | 11        | O1P      | 16G 400 | A     | --- | 94      | C                       | ALA 75   | A      |       | 3.885    |  |  |
| 26                      | 1         | C1       | 16G 400 | A     | --- | 109     | O                       | ALA 74   | A      |       | 3.490    |  |  |
| 27                      | 10        | O1       | 16G 400 | A     | --- | 108     | C                       | ALA 74   | A      |       | 3.414    |  |  |
| 28                      | 18        | O7       | 16G 400 | A     | --- | 87      | CB                      | ALA 73   | A      |       | 3.545    |  |  |
| 29                      | 10        | O1       | 16G 400 | A     | --- | 87      | CB                      | ALA 73   | A      |       | 3.549    |  |  |
| 30                      | 9         | N2       | 16G 400 | A     | --- | 87      | CB                      | ALA 73   | A      |       | 3.730    |  |  |
| 31                      | 7         | C7       | 16G 400 | A     | --- | 87      | CB                      | ALA 73   | A      |       | 3.578    |  |  |
| 32                      | 18        | O7       | 16G 400 | A     | --- | 117     | CG2                     | VAL 57   | A      |       | 3.868    |  |  |
| 33                      | 7         | C7       | 16G 400 | A     | --- | 74      | OD2                     | ASP 53   | A      |       | 3.637    |  |  |
| 34                      | 7         | C7       | 16G 400 | A     | --- | 73      | OD1                     | ASP 53   | A      |       | 3.897    |  |  |
| 35                      | 18        | O7       | 16G 400 | A     | --- | 72      | CG                      | ASP 53   | A      |       | 3.845    |  |  |
| 36                      | 9         | N2       | 16G 400 | A     | --- | 72      | CG                      | ASP 53   | A      |       | 3.632    |  |  |
| 37                      | 6         | C6       | 16G 400 | A     | --- | 29      | NH1                     | ARG 49   | A      |       | 3.541    |  |  |
| 38                      | 5         | C5       | 16G 400 | A     | --- | 29      | NH1                     | ARG 49   | A      |       | 3.739    |  |  |
| 39                      | 17        | O6       | 16G 400 | A     | --- | 28      | CZ                      | ARG 49   | A      |       | 3.807    |  |  |
| 40                      | 12        | O2P      | 16G 400 | A     | --- | 28      | CZ                      | ARG 49   | A      |       | 3.829    |  |  |



Table S2. Continuation.

PDB code: 8EYM chain B

Hydrogen bonds

| <----- A T O M 1 -----> |           |          |        |       |   |         | <----- A T O M 2 -----> |          |        |       |          |       |  |
|-------------------------|-----------|----------|--------|-------|---|---------|-------------------------|----------|--------|-------|----------|-------|--|
| Atom no                 | Atom name | Res name | Res no | Chain |   | Atom no | Atom name               | Res name | Res no | Chain | Distance |       |  |
| 1                       | 61        | N        | SER    | 237   | A | ---     | 82                      | O        | HOH    | 27    | S        | 2.974 |  |
| 2                       | 95        | OH       | TYR    | 215   | A | ---     | 83                      | O        | HOH    | 132   | S        | 3.167 |  |
| 3                       | 110       | N        | GLY    | 212   | A | ---     | 20                      | O        | HOH    | 9     | S        | 2.514 |  |
| 4                       | 20        | O        | HOH    | 9     | S | ---     | 60                      | OH       | TYR    | 61    | A        | 3.199 |  |
| 5                       | 83        | O        | HOH    | 132   | S | ---     | 18                      | O7       | 16G    | 400   | B        | 3.185 |  |
| 6                       | 82        | O        | HOH    | 27    | S | ---     | 15                      | O4       | 16G    | 400   | B        | 2.778 |  |
| 7                       | 20        | O        | HOH    | 9     | S | ---     | 14                      | O3P      | 16G    | 400   | B        | 3.012 |  |
| 8                       | 20        | O        | HOH    | 9     | S | ---     | 11                      | O1P      | 16G    | 400   | B        | 3.335 |  |
| 9                       | 48        | OG       | SER    | 77    | B | ---     | 11                      | O1P      | 16G    | 400   | B        | 2.754 |  |
| 10                      | 43        | N        | SER    | 77    | B | ---     | 12                      | O2P      | 16G    | 400   | B        | 2.728 |  |
| 11                      | 9         | N2       | 16G    | 400   | B | ---     | 73                      | OD1      | ASP    | 53    | B        | 3.349 |  |
| 12                      | 42        | NH2      | ARG    | 49    | B | ---     | 12                      | O2P      | 16G    | 400   | B        | 2.768 |  |
| 13                      | 41        | NH1      | ARG    | 49    | B | ---     | 17                      | O6       | 16G    | 400   | B        | 3.065 |  |
| 14                      | 66        | OG       | SER    | 237   | A | ---     | 14                      | O3P      | 16G    | 400   | B        | 2.699 |  |
| 15                      | 31        | NH2      | ARG    | 211   | A | ---     | 12                      | O2P      | 16G    | 400   | B        | 2.912 |  |
| 16                      | 28        | NE       | ARG    | 211   | A | ---     | 14                      | O3P      | 16G    | 400   | B        | 2.789 |  |
| 17                      | 60        | OH       | TYR    | 61    | A | ---     | 11                      | O1P      | 16G    | 400   | B        | 2.645 |  |

Non-bonded contacts

| <----- A T O M 1 -----> |           |          |        |       |   |         | <----- A T O M 2 -----> |          |        |       |          |       |  |
|-------------------------|-----------|----------|--------|-------|---|---------|-------------------------|----------|--------|-------|----------|-------|--|
| Atom no                 | Atom name | Res name | Res no | Chain |   | Atom no | Atom name               | Res name | Res no | Chain | Distance |       |  |
| 1                       | 19        | P        | 16G    | 401   | B | ---     | 47                      | CB       | SER    | 77    | B        | 3.692 |  |
| 2                       | 12        | O2P      | 16G    | 400   | B | ---     | 47                      | CB       | SER    | 77    | B        | 3.341 |  |
| 3                       | 11        | O1P      | 16G    | 400   | B | ---     | 47                      | CB       | SER    | 77    | B        | 3.304 |  |
| 4                       | 12        | O2P      | 16G    | 400   | B | ---     | 44                      | CA       | SER    | 77    | B        | 3.529 |  |
| 5                       | 17        | O6       | 16G    | 400   | B | ---     | 81                      | CD       | PRO    | 76    | B        | 3.282 |  |
| 6                       | 12        | O2P      | 16G    | 400   | B | ---     | 81                      | CD       | PRO    | 76    | B        | 3.364 |  |
| 7                       | 12        | O2P      | 16G    | 400   | B | ---     | 80                      | CG       | PRO    | 76    | B        | 3.827 |  |
| 8                       | 12        | O2P      | 16G    | 400   | B | ---     | 79                      | CB       | PRO    | 76    | B        | 3.587 |  |
| 9                       | 12        | O2P      | 16G    | 400   | B | ---     | 77                      | C        | PRO    | 76    | B        | 3.559 |  |
| 10                      | 12        | O2P      | 16G    | 400   | B | ---     | 76                      | CA       | PRO    | 76    | B        | 3.700 |  |
| 11                      | 11        | O1P      | 16G    | 400   | B | ---     | 123                     | CB       | ALA    | 75    | B        | 3.592 |  |
| 12                      | 16        | O5       | 16G    | 400   | B | ---     | 120                     | CA       | ALA    | 75    | B        | 3.850 |  |
| 13                      | 1         | C1       | 16G    | 400   | B | ---     | 117                     | O        | ALA    | 74    | B        | 3.552 |  |
| 14                      | 10        | O1       | 16G    | 400   | B | ---     | 116                     | C        | ALA    | 74    | B        | 3.449 |  |
| 15                      | 10        | O1       | 16G    | 400   | B | ---     | 109                     | CB       | ALA    | 73    | B        | 3.168 |  |
| 16                      | 9         | N2       | 16G    | 400   | B | ---     | 109                     | CB       | ALA    | 73    | B        | 3.629 |  |
| 17                      | 8         | C8       | 16G    | 400   | B | ---     | 109                     | CB       | ALA    | 73    | B        | 3.800 |  |
| 18                      | 7         | C7       | 16G    | 400   | B | ---     | 109                     | CB       | ALA    | 73    | B        | 3.850 |  |
| 19                      | 10        | O1       | 16G    | 400   | B | ---     | 107                     | C        | ALA    | 73    | B        | 3.843 |  |
| 20                      | 8         | C8       | 16G    | 400   | B | ---     | 149                     | CG2      | VAL    | 57    | B        | 3.534 |  |
| 21                      | 8         | C8       | 16G    | 400   | B | ---     | 74                      | OD2      | ASP    | 53    | B        | 3.798 |  |
| 22                      | 3         | C3       | 16G    | 400   | B | ---     | 74                      | OD2      | ASP    | 53    | B        | 3.807 |  |
| 23                      | 9         | N2       | 16G    | 400   | B | ---     | 72                      | CG       | ASP    | 53    | B        | 3.818 |  |
| 24                      | 6         | C6       | 16G    | 400   | B | ---     | 41                      | NH1      | ARG    | 49    | B        | 3.507 |  |
| 25                      | 5         | C5       | 16G    | 400   | B | ---     | 41                      | NH1      | ARG    | 49    | B        | 3.775 |  |
| 26                      | 12        | O2P      | 16G    | 400   | B | ---     | 40                      | CZ       | ARG    | 49    | B        | 3.642 |  |
| 27                      | 18        | O7       | 16G    | 400   | B | ---     | 131                     | C8       | 16G    | 400   | A        | 3.895 |  |
| 28                      | 4         | C4       | 16G    | 400   | B | ---     | 103                     | OE1      | GLU    | 240   | A        | 3.615 |  |
| 29                      | 3         | C3       | 16G    | 400   | B | ---     | 103                     | OE1      | GLU    | 240   | A        | 3.659 |  |
| 30                      | 15        | O4       | 16G    | 400   | B | ---     | 102                     | CD       | GLU    | 240   | A        | 3.496 |  |
| 31                      | 15        | O4       | 16G    | 400   | B | ---     | 101                     | CG       | GLU    | 240   | A        | 3.596 |  |
| 32                      | 15        | O4       | 16G    | 400   | B | ---     | 100                     | CB       | GLU    | 240   | A        | 3.426 |  |
| 33                      | 14        | O3P      | 16G    | 400   | B | ---     | 65                      | CB       | SER    | 237   | A        | 3.312 |  |
| 34                      | 6         | C6       | 16G    | 400   | B | ---     | 65                      | CB       | SER    | 237   | A        | 3.834 |  |
| 35                      | 14        | O3P      | 16G    | 400   | B | ---     | 29                      | CZ       | ARG    | 211   | A        | 3.665 |  |
| 36                      | 12        | O2P      | 16G    | 400   | B | ---     | 29                      | CZ       | ARG    | 211   | A        | 3.712 |  |
| 37                      | 14        | O3P      | 16G    | 400   | B | ---     | 27                      | CD       | ARG    | 211   | A        | 3.562 |  |
| 38                      | 11        | O1P      | 16G    | 400   | B | ---     | 59                      | CZ       | TYR    | 61    | A        | 3.571 |  |
| 39                      | 11        | O1P      | 16G    | 400   | B | ---     | 57                      | CE1      | TYR    | 61    | A        | 3.603 |  |

## Rate equation

Considering that the active site is not formed until the novel allosteric site is formed ( $ES_A$ ), the main forms of the dimeric enzyme bound to the substrate will be those shown in Scheme 1.

For this Scheme the rate equation is

$$v_0 = k_p[E_2S_AS_S] + 2k_p[E_2S_{A_2}S_S] + k_p[E_2S_{A_2}S_{S_2}] \dots \text{Eq. S1}$$

From the definition of the dissociation constants of each complex

$$[E_2S_A] = \frac{[E_2][S]}{K_{A1}} \dots \text{Eq. S2}$$

$$[E_2S_AS_S] = \frac{[E_2S_A][S]}{K_{S1}} \dots \text{Eq. S3}$$

$$\text{By substituting Eq. 2 in Eq. 3, } [E_2S_AS_S] = \frac{[E_2][S]^2}{K_{A1}K_{S1}} \dots \text{Eq. S6}$$

$$[E_2S_{A_2}S_S] = \frac{[E_2S_AS_S][S]}{K_{A2}} \dots \text{Eq. S4}$$

$$\text{By substituting Eq. 6 in Eq. 4, } [E_2S_{A_2}S_S] = \frac{[E_2][S]^3}{K_{A1}K_{S1}K_{A2}} \dots \text{Eq. S7}$$

$$[E_2S_{A_2}S_{S_2}] = \frac{[E_2S_{A_2}S_S][S]}{K_{S2}} \dots \text{Eq. S5}$$

$$\text{By substituting Eq. 7 in Eq. 5, } [E_2S_{A_2}S_{S_2}] = \frac{[E_2][S]^4}{K_{A1}K_{S1}K_{A2}K_{S2}} \dots \text{Eq. S8}$$

The mass balance for the enzyme forms is

$$[E_2]_T = [E_2] + [E_2S_A] + [E_2S_AS_S] + [E_2S_{A_2}S_S] + [E_2S_{A_2}S_{S_2}] \dots \text{Eq. S9}$$

where  $[E_2]_T$  is the total amount of enzyme.

Dividing Eq. S1 by Eq. S9

$$\frac{v_0}{[E_2]_T} = \frac{k_p[E_2S_AS_S] + 2k_p[E_2S_{A_2}S_S] + k_p[E_2S_{A_2}S_{S_2}]}{[E_2] + [E_2S_A] + [E_2S_AS_S] + [E_2S_{A_2}S_S] + [E_2S_{A_2}S_{S_2}]} \dots \text{Eq. S10}$$

Substituting Eqs. S2, S6, S7 and S8 in Eq. S10, reordering and considering that  $V_{\max} = k_p [E_2]_{\text{T}}$

$$v_0 = \frac{V_{\max} \left( \frac{[S]^2}{K_{S1}} + 2 \frac{[S]^3}{K_{S1}K_{A2}} + \frac{[S]^4}{K_{S1}K_{A2}K_{S2}} \right)}{K_{A1} + [S] + \frac{[S]^2}{K_{S1}} + \frac{[S]^3}{K_{S1}K_{A2}} + \frac{[S]^4}{K_{S1}K_{A2}K_{S2}}} \dots \text{Eq. S11 (Eq. 2 in paper)}$$

Equation S11 (Eq. 2 in the main body of the paper) resembles the Adair equation for a tetramer, which has the substrate concentration raised at the fourth power. Here, the substrate concentration is also raised at the fourth power, even when it has only two active sites. This explains the intense sigmoidicity ( $n_H \geq 2$ ) of the rate vs. substrate concentration curve in the absence of the allosteric activator GlcNAc6P (Fig. 5).

## References

1. R. A. Laskowski, M. B. Swindells, LigPlot+: Multiple Ligand–Protein Interaction Diagrams for Drug Discovery. *J. Chem. Inf. Model.* **51**, 2778–2786 (2011).
